# Supplementary material
Source: PubMed Central journal article supplement (PMC4188754)
Supplement: NIHMS629849-supplement.pdf [file NIHMS629849-supplement.pdf]

## **Supplementary Material**

### **Role of white adipose lipolysis in the development of NASH induced by methionine- and choline-deficient diet**

Naoki Tanaka<sup>1</sup>, Shogo Takahashi<sup>1</sup>, Zhong-Ze Fang<sup>1,2</sup>, Tsutomu Matsubara<sup>1,3</sup>, Kristopher W. Krausz<sup>1</sup>, Aijuan Qu<sup>1</sup>, and Frank J. Gonzalez<sup>1</sup>

<sup>1</sup>Laboratory of Metabolism, Center for Cancer Research, National Cancer Institute, National Institutes of Health, Bethesda, MD

<sup>2</sup>Department of Toxicology, School of Public Health, Tianjin Medical University, Tianjin, China

<sup>3</sup>Department of Anatomy and Regenerative Biology, Osaka City University, Osaka, Japan

**Numbers of Supplementary Figures and Tables:** 6 figures and 2 tables.

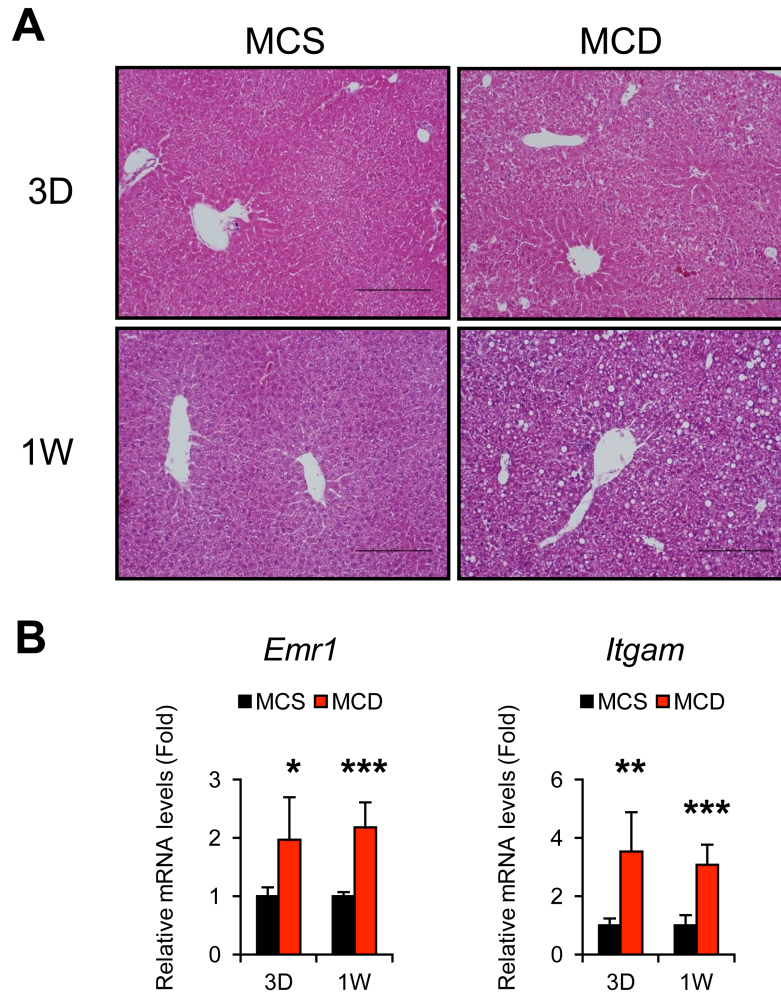

**Supplementary Fig. 1. Phenotypic changes in mice with 3-day or 1-week MCD treatment.**

(A) Liver histology. Hematoxylin and eosin staining; Bar = 200  $\mu$ m.

(B) The mRNA levels of *Emr1* and *Itgam*. The mRNA levels were normalized to those of 18S ribosomal mRNA and subsequently normalized to those of MCS-treated mice.

Statistical analysis was performed using the Student's *t*-test.  $n = 5$  /group. \* $P < 0.05$ , \*\* $P < 0.01$ , \*\*\* $P < 0.001$  vs. MCS-treated mice in the same time point. The full terms of the gene names are listed in Supplementary Table 2.

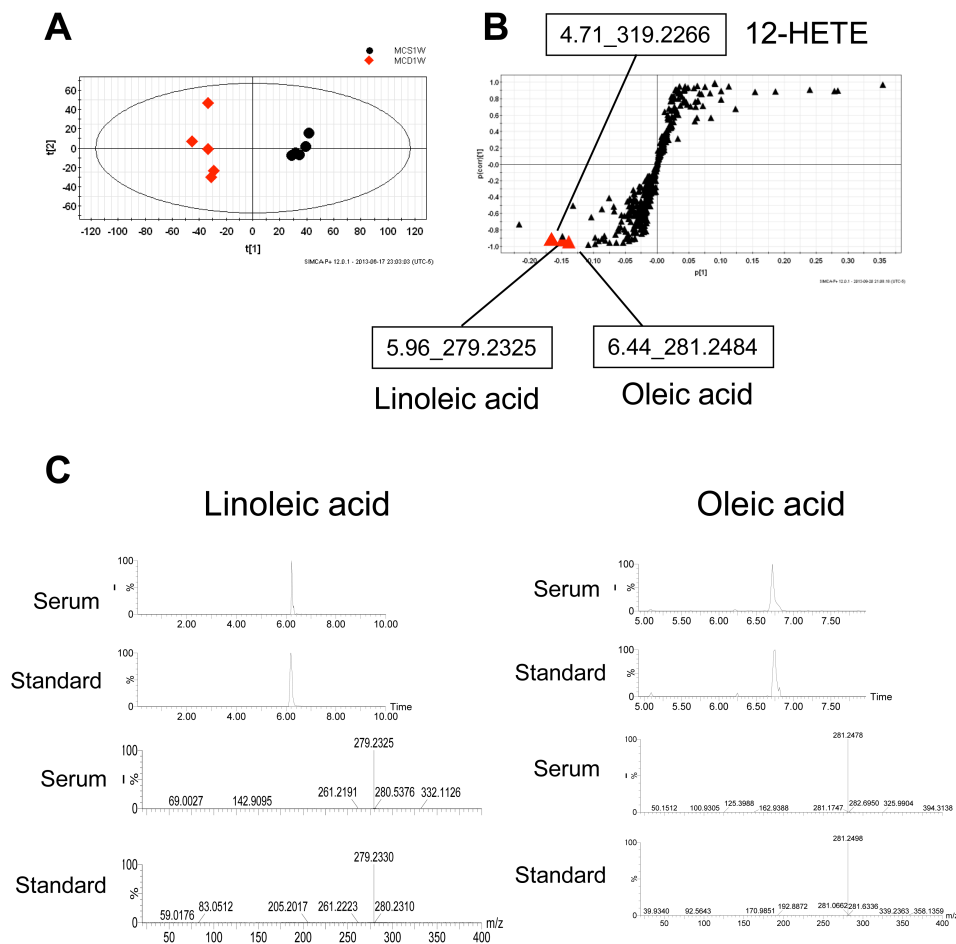

**Supplementary Fig. 2. Serum metabolomic analysis of mice with 1-week MCD treatment.**

(A) PCA of serum metabolites between mice treated with 1-week MCD (red diamond,  $n = 5$ ) and MCS (black circle,  $n = 5$ ).

(B) S-plot of OPLA analysis using the same samples as (A). Retention time and molecular mass were indicated.

(C) MS/MS fragmentation patterns of oleic acid and linoleic acid.

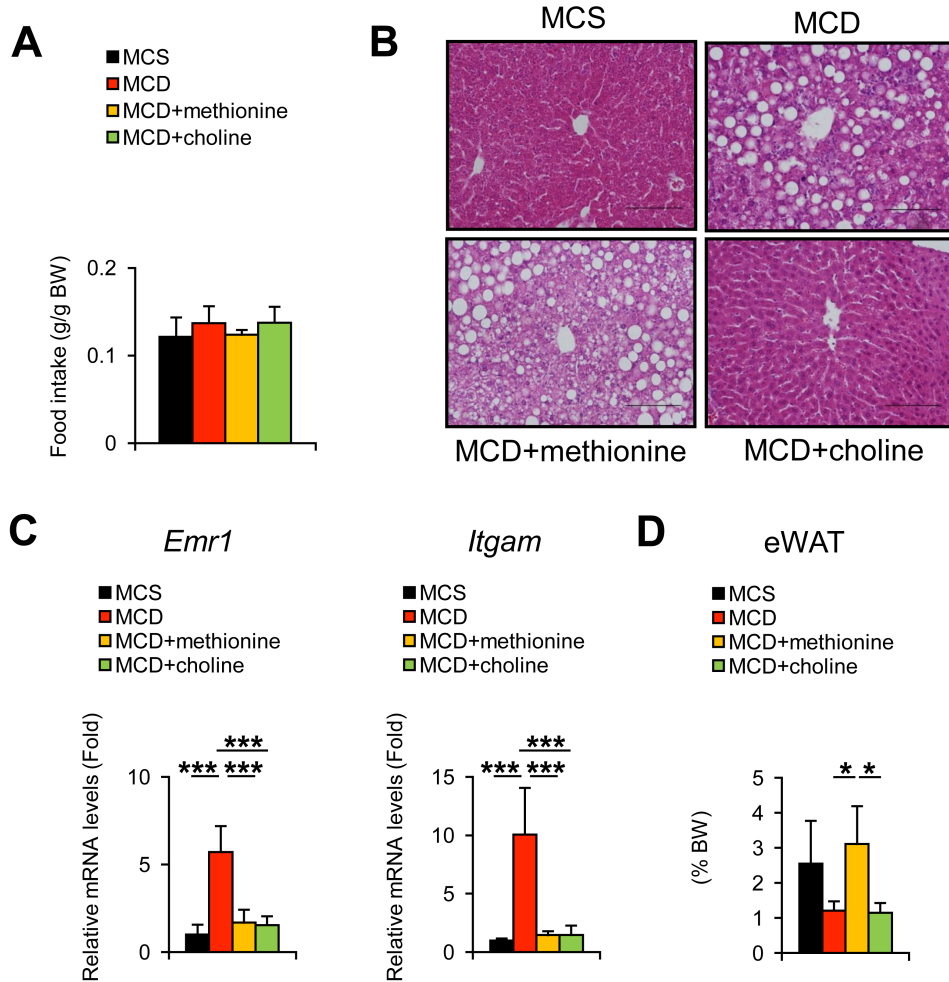

**Supplementary Fig.3. The effect of supplementation of methionine or choline to the phenotypic changes in mice with 2-week MCD treatment.**

(A) Food intake.  
 (B) Liver histology. Hematoxylin and eosin staining; Bar = 100  $\mu$ m.  
 (C) The mRNA levels of *Emr1* and *Itgam*. The mRNA levels were normalized to those of 18S ribosomal mRNA and subsequently normalized to those of MCS-treated mice.  
 (D) Epididymal WAT weight.

Statistical analysis was performed using the one-way ANOVA test with Bonferroni's correction. n = 5 /group; \*,  $P < 0.05$ ; \*\*,  $P < 0.01$ ; \*\*\*,  $P < 0.001$ .



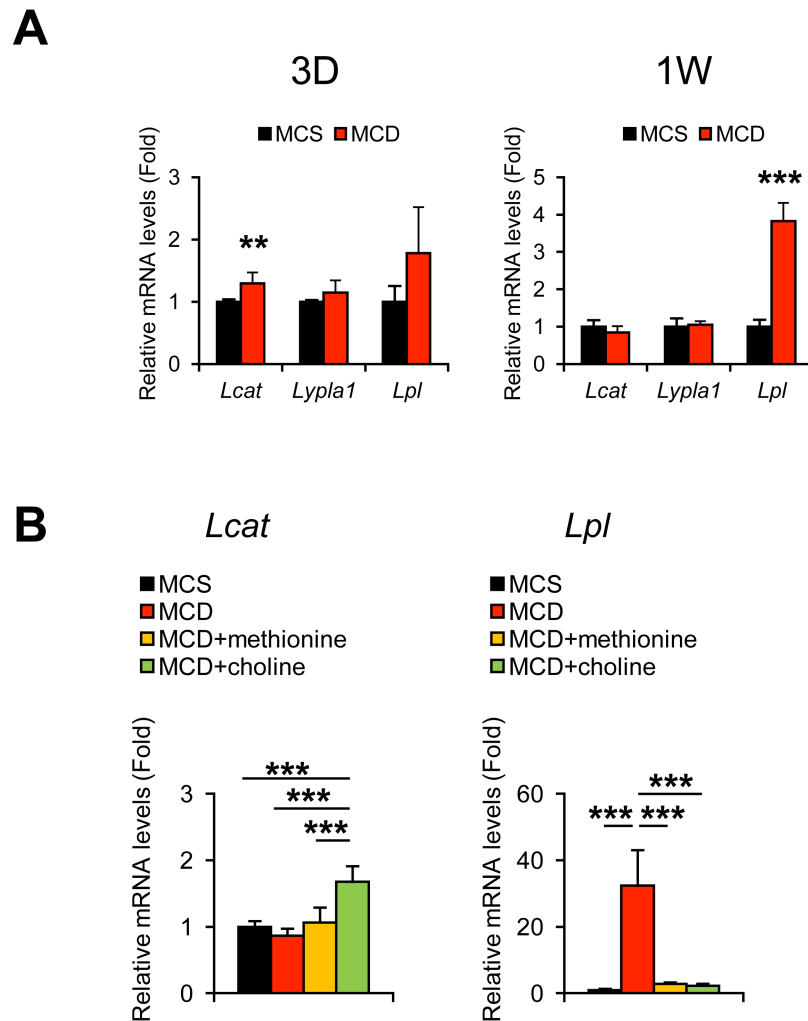

**Supplementary Fig. 4. The changes in mRNAs encoding *Lcat*, *Lypla1*, and *Lpl* in mice treated with MCD.**

(A) The mRNA levels of mice treated with MCD for 3 days and 1 week. The same samples used in Supplementary Fig. 1 were conducted. Statistical analysis was performed using the Student's *t*-test.  $n = 5$  /group. \* $P < 0.05$ , \*\* $P < 0.01$ , \*\*\* $P < 0.001$  vs. MCS-treated mice in the same time point.

(B) The effect of supplementation of methionine or choline on the levels of mRNAs encoding *Lcat* and *Lpl* in mice with 2-week MCD treatment. The same samples used in Fig. 4 and 5 were assayed. Statistical analysis was performed using the one-way ANOVA test with Bonferroni's correction.  $n = 5$  /group. \*,  $P < 0.05$ ; \*\*,  $P < 0.01$ ; \*\*\*,  $P < 0.001$ .

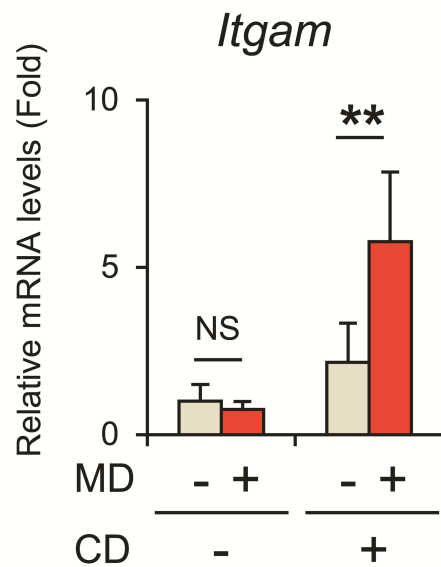

**Supplementary Fig. 5. The effect of dietary methionine deficiency on hepatic mRNA levels of *Itgam*.**

The same samples used in Fig. 7 were conducted. The mRNA levels were normalized to those of 18S ribosomal mRNA and subsequently normalized to those of MCS-treated mice.

Statistical analysis was performed using the Student's *t*-test. \*\* $P < 0.01$  vs. CD-treated mice (designated as CD+ MD-); NS, not significant.

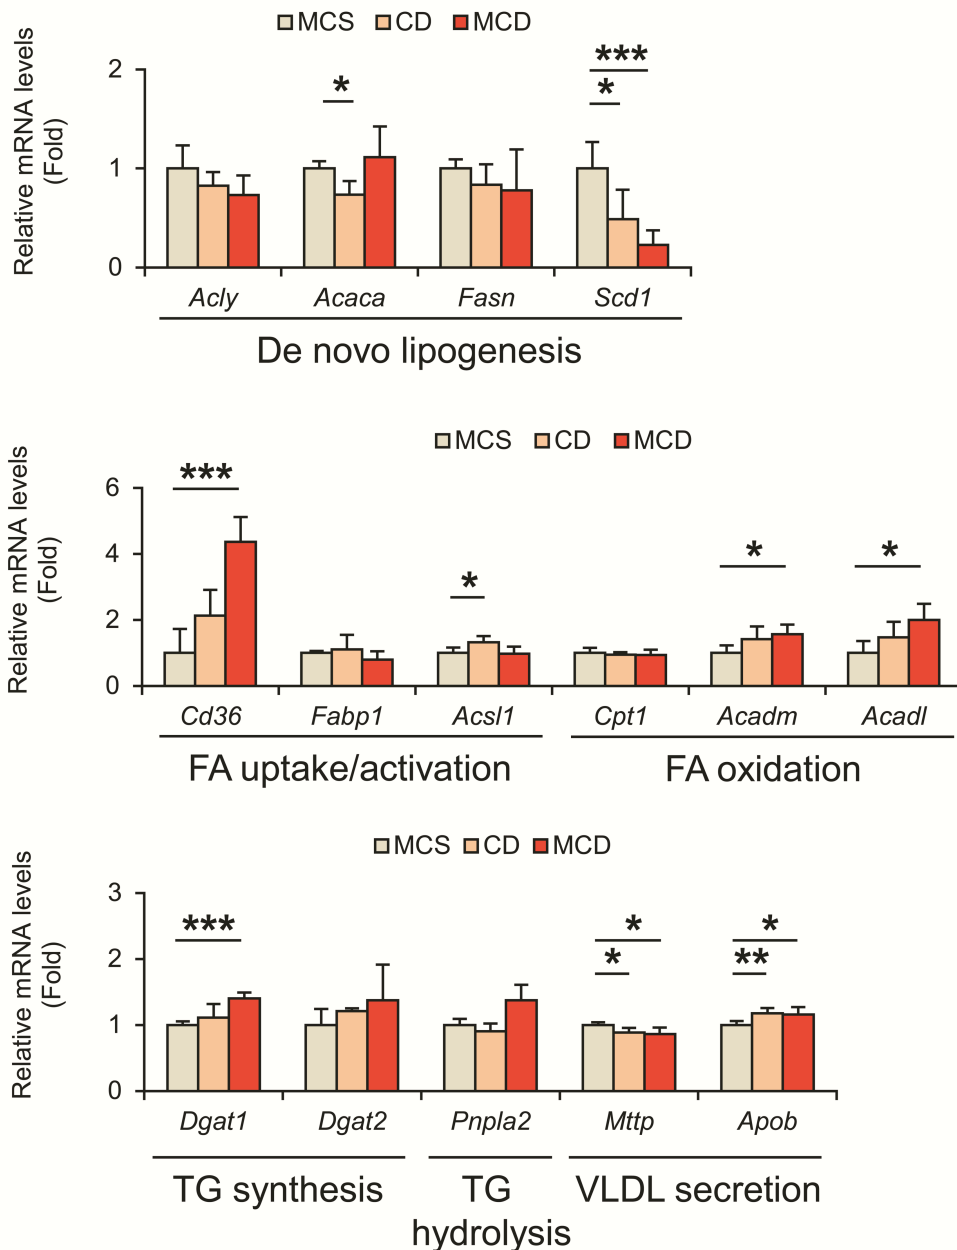

**Supplementary Fig. 6. The changes in mRNAs encoding genes associated with steatogenesis in mice treated with CD and MCD for 2 weeks.**

The same samples in Fig. 7 were used for this qPCR analysis. The mRNA levels were normalized to those of 18S ribosomal mRNA and subsequently normalized to those of MCS-treated mice.

Statistical analysis was performed using the Student's *t*-test.  $n = 4-5$  /group. \* $P < 0.05$ , \*\* $P < 0.01$ , \*\*\* $P < 0.001$  vs. MCS-treated mice. Full terms of the gene names were listed in Supplementary Table 2. FA, fatty acid; TG, triglyceride; VLDL, very-low-density lipoprotein.

**Supplementary Table 1. Composition of the diet used in this study**

|                        | MCS  | MCD  | CD   | MD   |
|------------------------|------|------|------|------|
| Cornstarch             | 100  | 100  | 100  | 100  |
| Dextrin                | 100  | 100  | 100  | 100  |
| Sucrose                | 392  | 409  | 407  | 394  |
| Cellulose              | 50   | 50   | 50   | 50   |
| Corn oil               | 50   | 50   | 50   | 50   |
| Primex                 | 100  | 100  | 100  | 100  |
| Salt                   | 35   | 35   | 35   | 35   |
| Sodium bicarbonate     | 4.3  | 4.3  | 4.3  | 4.3  |
| Vitamin mix            | 10   | 10   | 10   | 10   |
| Choline Bitartrate     | 14.5 | 0    | 0    | 14.5 |
| Ferric Citrate, U.S.P. | 0.3  | 0.1  | 0.3  | 0.3  |
| Amino acid             | 144  | 142  | 144  | 142  |
| L-Alanine              | 5.1  | 5.1  | 5.1  | 5.1  |
| L-Arginine             | 12.7 | 12.7 | 12.7 | 12.7 |
| L-Aspartic Acid        | 15.8 | 15.8 | 15.8 | 15.8 |
| L-Cystine              | 3.7  | 3.7  | 3.7  | 3.7  |
| L-Glutamic Acid        | 28.9 | 28.9 | 28.9 | 28.9 |
| Glycine                | 6.2  | 6.2  | 6.2  | 6.2  |
| L-Histidine            | 3.4  | 3.4  | 3.4  | 3.4  |
| L-Isoleucine           | 6.1  | 6.1  | 6.1  | 6.1  |
| L-Leucine              | 10.5 | 10.5 | 10.5 | 10.5 |
| L-Lysine-HCl           | 9.1  | 9.1  | 9.1  | 9.1  |
| L-Methionine           | 1.7  | 0    | 1.7  | 0    |
| L-Phenylalanine        | 7.3  | 7.3  | 7.3  | 7.3  |
| L-Proline              | 7.6  | 7.6  | 7.6  | 7.6  |
| L-Serine               | 7.2  | 7.2  | 7.2  | 7.2  |
| L-Threonine            | 4.6  | 4.6  | 4.6  | 4.6  |
| L-Tryptophan           | 1.8  | 1.8  | 1.8  | 1.8  |
| L-Tyrosine             | 5.7  | 5.7  | 5.7  | 5.7  |
| L-Valine               | 6.3  | 6.3  | 6.3  | 6.3  |

Values indicate gram/kilogram of diet.

**Supplementary Table 2. Primer pairs used for qPCR**

| Gene         | GenBank Accession Number |   | Primer Sequence (5'-3')  |
|--------------|--------------------------|---|--------------------------|
| 18S          | NR_003278                | F | ATTGGAGCTGGAATTACCGC     |
|              |                          | R | CGGCTACCACATCCAAGGAA     |
| <i>Acadl</i> | NM_007381                | F | TCTTGCATCAGCTCTTTCA      |
|              |                          | R | GGTACATGTGGGAGTACCCG     |
| <i>Acadm</i> | NM_007382                | F | AGCTCTAGACGAAGCCACGA     |
|              |                          | R | GCGAGCAGAAATGAACTCC      |
| <i>Acaca</i> | NM_133360                | F | TGGTGCAGAGGTACCGAAGTG    |
|              |                          | R | CGTAGTGGCCGTTCTGAACT     |
| <i>Acly</i>  | NM_134037                | F | GTGGCCCCAACTATCAAGAG     |
|              |                          | R | AATGGCCGTCATGTGAGTTT     |
| <i>Acs11</i> | NM_007981                | F | CTTCCAACCAACACCCTCAT     |
|              |                          | R | ACCATCAGTGGTACCCGCTA     |
| <i>Apob</i>  | NM_009693                | F | AAGCACCTCCGAAAGTACGTG    |
|              |                          | R | CTCCAGCTCTACCTTACAGTTGA  |
| <i>Adrb1</i> | NM_007419                | F | GCTGATCTGGTCATGGGATT     |
|              |                          | R | AAGTCCAGAGCTCGCAGAAG     |
| <i>Adrb2</i> | NM_007420                | F | ATTTTGGCAACTTCTGGTGC     |
|              |                          | R | TAGCGATCCACTGCAATCAC     |
| <i>Adrb3</i> | NM_013462                | F | ACAGGAATGCCACTCCAATC     |
|              |                          | R | GGGGAAGGTAGAAGGAGACG     |
| <i>Cd36</i>  | NM_007643                | F | GCGACATGATTAATGGCACA     |
|              |                          | R | CCTGCAAATGTCAGAGGAAA     |
| <i>Ces3</i>  | NM_053200                | F | TGGTATTTGGTGTCCCATCA     |
|              |                          | R | GCTTGGGCGATACTCAAAC      |
| <i>Cpt1a</i> | NM_013495                | F | GCCCATGTTGTACAGCTTCC     |
|              |                          | R | ATGGCAGAGGCTCACCAAGC     |
| <i>Dgat1</i> | NM_010046                | F | GACGGCTACTGGGATCTGA      |
|              |                          | R | TCACCACACACCAATTCAGG     |
| <i>Dgat2</i> | NM_026384                | F | CGCAGCGAAAACAAGAATAA     |
|              |                          | R | GAAGATGTCTTGGAGGGCTG     |
| <i>Emr1</i>  | NM_010130                | F | GGATGTACAGATGGGGGATG     |
|              |                          | R | CATAAGCTGGGCAAGTGGTA     |
| <i>Fabp1</i> | NM_017399                | F | TGCAGAGCCAGGAGAACTTT     |
|              |                          | R | GATTTCTGACACCCCTTGA      |
| <i>Fabp4</i> | NM_024406                | F | CATGGCCAAGCCCAACAT       |
|              |                          | R | CGCCCAGTTTGAAGGAAATC     |
| <i>Fasn</i>  | NM_007988                | F | AAGTTGCCCGAGTCAGAGAACC   |
|              |                          | R | ATCCATAGAGCCCAGCCTTCCATC |
| <i>Fgf21</i> | NM_020013                | F | CCTGGGTGTCAAAGCCTCTA     |
|              |                          | R | CTCCAGCAGCAGTTCTCTGA     |
| <i>Fsp27</i> | NM_178373                | F | TGGGAGGTCCAACACAATCCA    |
|              |                          | R | GTGCTCACTGCCACATGCCT     |
| <i>Lipe</i>  | NM_010719                | F | CCTCCAAGCAGGGCAAAGA      |
|              |                          | R | GCGTAAATCCATGCTGTGTGA    |
| <i>Il1b</i>  | NM_008361                | F | GGACCCATATGAGCTGAAAGCT   |
|              |                          | R | TGTCGTTGCTTGGTTCTCCTT    |
| <i>Itgam</i> | NM_008401                | F | ATTCGGTGATCCCTTGGATT     |
|              |                          | R | GTTTGTGAAGGCATTTCCC      |
| <i>Lcat</i>  | NM_008490                | F | GGTTTTATCTCTCTCGGGGC     |
|              |                          | R | TATGTTGGACAGGATGGGGA     |

|               |           |   |                       |
|---------------|-----------|---|-----------------------|
| <i>Lpl</i>    | NM_008509 | F | TTTGGCTCCAGAGTTTGACC  |
|               |           | R | TGTGTCTTCAGGGGTCCTTAG |
| <i>Lypla1</i> | NM_008866 | F | CCTTCACGGATTGGGAGATA  |
|               |           | R | GGGGCATGTGGACAGATGTA  |
| <i>Mttp</i>   | NM_008642 | F | AGGTGCTGGGGGTCAGTT    |
|               |           | R | GGCAAAGCCCTGGTCTCTT   |
| <i>Plin1</i>  | NM_175640 | F | TGAAGCAGGGCCACTCTC    |
|               |           | R | GACACCACCTGCATGGCT    |
| <i>Pnpla2</i> | NM_025802 | F | CCACTCACATCTACGGAGCC  |
|               |           | R | TAATGTTGGCACCTGCTTCA  |
| <i>Scd1</i>   | NM_009127 | F | ACGCCGACCCTCACAATTC   |
|               |           | R | CAGTTTTCCGCCCTTCTCTTT |
| <i>Slc2a4</i> | NM_009204 | F | TTTTAAAACAAGATGCCGTCG |
|               |           | R | CAGTGTTCAGTCACTCGCT   |
| <i>Tnf</i>    | NM_013693 | F | CCACCACGCTCTTCTGTCTAC |
|               |           | R | AGGGTCTGGGCCATAGAACT  |

F, forward sequence; R, reverse sequence.

*Acadl*, acyl-CoA dehydrogenase, long-chain

*Acadm*, acyl-CoA dehydrogenase, medium-chain

*Acaca*, acetyl-CoA carboxylase alpha

*Acly*, ATP citrate lyase

*Acs11*, acyl-CoA synthetase long-chain family member 1

*Apob*, apolipoprotein B

*Adrb*, adrenergic receptor, beta

*Cd36*, CD36 antigen (fatty acid translocase)

*Ces3*, carboxylesterase 3

*Cpt1a*, carnitine palmitoyltransferase 1a, liver

*Dgat*, diacylglycerol O-acyltransferase

*Emr1*, EGF-like module containing, mucin-like, hormone receptor-like sequence 1

*Fabp*, fatty acid-binding protein

*Fasn*, fatty acid synthase

*Fgf21*, fibroblast growth factor 21

*Fsp27*, fat-specific protein 27 (cell death-inducing DFFA-like effector c)

*Il1b*, interleukin 1 beta

*Igam*, integrin alpha M

*Lcat*, lecithin cholesterol acyltransferase

*Lipe*, hormone-sensitive lipase

*Lpl*, lipoprotein lipase

*Lypla1*, lysophospholipase 1

*Mttp*, microsomal triglyceride transfer protein

*Plin1*, perilipin 1

*Pnpla2*, patatin-like phospholipase domain containing 2 (adipose triglyceride lipase)

*Scd1*, stearoyl-CoA desaturase 1

*Slc2a4*, solute carrier family 2, member 4 (glucose transporter type 4)

*Tnf*, tumor necrosis factor alpha
